# Supplementary material
Source: PubMed Central journal article supplement (PMC7116583)
Supplement: EMS109771-supplement-Supplemental_File.pdf [file EMS109771-supplement-Supplemental_File.pdf]

**Table S1:** Demographics data of healthy controls, MCI and AD patients.

| <b>Entire DTI cohort</b>       |                               |                               |                               |
|--------------------------------|-------------------------------|-------------------------------|-------------------------------|
|                                | <i>MCI Patients</i>           | <i>AD Patients</i>            | <i>Controls</i>               |
| N total                        | 56                            | 53                            | 61                            |
| Gender F/M                     | 25/31                         | 33/20                         | 22/39                         |
| Age (mean $\pm$ SD, range)     | 70.1 $\pm$ 8.0<br>50.1 – 84.6 | 74.1 $\pm$ 8.6<br>49.1 – 89.7 | 71.1 $\pm$ 8.3<br>51.1 – 86.2 |
| CDR-sb* (mean $\pm$ SD, range) | 1.4 $\pm$ 1.0<br>0 – 4.5      | 4.0 $\pm$ 2.1<br>1 – 11       | 0.1 $\pm$ 0.2<br>0 – 1        |
| MMSE (mean $\pm$ SD, range)    | 27.9 $\pm$ 1.8<br>23** – 30   | 23.9 $\pm$ 2.7<br>18 – 29     | 29.9 $\pm$ 1.1<br>26 – 30     |
| <b>Tractography cohort</b>     |                               |                               |                               |
|                                | <i>AD Patients</i>            | <i>Controls</i>               |                               |
| N total (all females)          | 15                            | 15                            |                               |
| Age (mean $\pm$ SD, range)     | 67.2 $\pm$ 8.5<br>49.1 – 78.4 | 67.1 $\pm$ 7.4<br>51.1 – 80.6 |                               |
| CDR-sb* (mean $\pm$ SD, range) | 4.1 $\pm$ 1.8<br>1 – 7        | 0.1 $\pm$ 0.2<br>0 – 0.5      |                               |
| MMSE (mean $\pm$ SD, range)    | 23.7 $\pm$ 3.0<br>18 – 29     | 29.2 $\pm$ 1.2<br>26 – 30     |                               |

\*sb = sum of boxes

\*\*One patient with MMSE=23 was confirmed MCI as activities of daily living (ADL) impairment did not warrant diagnosis of dementia

**Table S2:** Neuropsychological scores and CSF concentrations for healthy controls, MCI and AD patients. All values were significantly different ( $P < 0.001$ ) between each pair of groups except for the phonological verbal fluency which did not differ between healthy controls and MCI patients.

| <b>Neuropsychological test</b>                       | <b>MCI Patients</b> | <b>AD Patients</b> | <b>Controls</b>   |
|------------------------------------------------------|---------------------|--------------------|-------------------|
| MMSE (mean $\pm$ SD)                                 | 27.9 $\pm$ 1.8      | 23.9 $\pm$ 2.7     | 29.9 $\pm$ 1.1    |
| Categorical verbal fluency (animals)(mean $\pm$ SD)  | 19.7 $\pm$ 4.3      | 12.7 $\pm$ 5.5     | 23.4 $\pm$ 5.3    |
| Phonological verbal fluency (S words)(mean $\pm$ SD) | 12.5 $\pm$ 3.8      | 7.4 $\pm$ 4.5      | 12.8 $\pm$ 4.3    |
| Boston naming test (mean $\pm$ SD)                   | 13.6 $\pm$ 2.1      | 12.2 $\pm$ 1.3     | 14.5 $\pm$ 0.8    |
| Trail making test (part A)* (mean $\pm$ SD)          | 50.9 $\pm$ 50.8     | 78.8 $\pm$ 21.1    | 38.0 $\pm$ 10.0   |
| Trail making test (part B)** (mean $\pm$ SD)         | 143.5 $\pm$ 114.6   | 229.3 $\pm$ 54.6   | 92.4 $\pm$ 25.5   |
| <b>CSF concentrations*** (pg/ml)</b>                 | <b>MCI Patients</b> | <b>AD Patients</b> | <b>Controls</b>   |
| Tau (mean $\pm$ SD)                                  | 421.8 $\pm$ 242.6   | 705.5 $\pm$ 304.3  | 258.0 $\pm$ 16.0  |
| Phosphorylated tau (mean $\pm$ SD)                   | 63.9 $\pm$ 26.1     | 97.9 $\pm$ 41.5    | 47.5 $\pm$ 17.6   |
| $\beta$ -amyloid (mean $\pm$ SD)                     | 584.9 $\pm$ 264.9   | 413.8 $\pm$ 134.6  | 797.0 $\pm$ 266.1 |

\*3 AD patients did not complete the test

\*\*2 MCI patients and 22 AD patients did not complete the test

\*\*\*Concentrations were collected for 26 controls

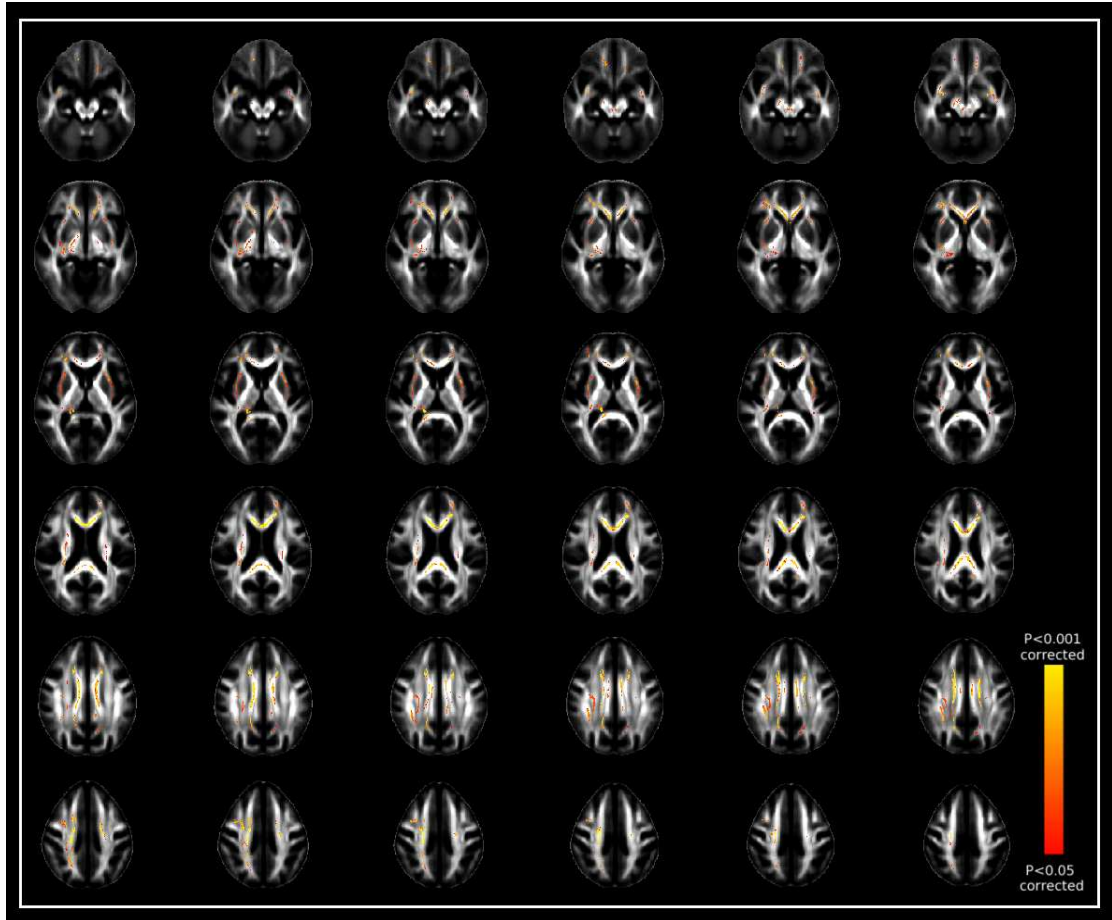

**Figure S1:** Significant FA differences across the three groups ( $F$ -test)

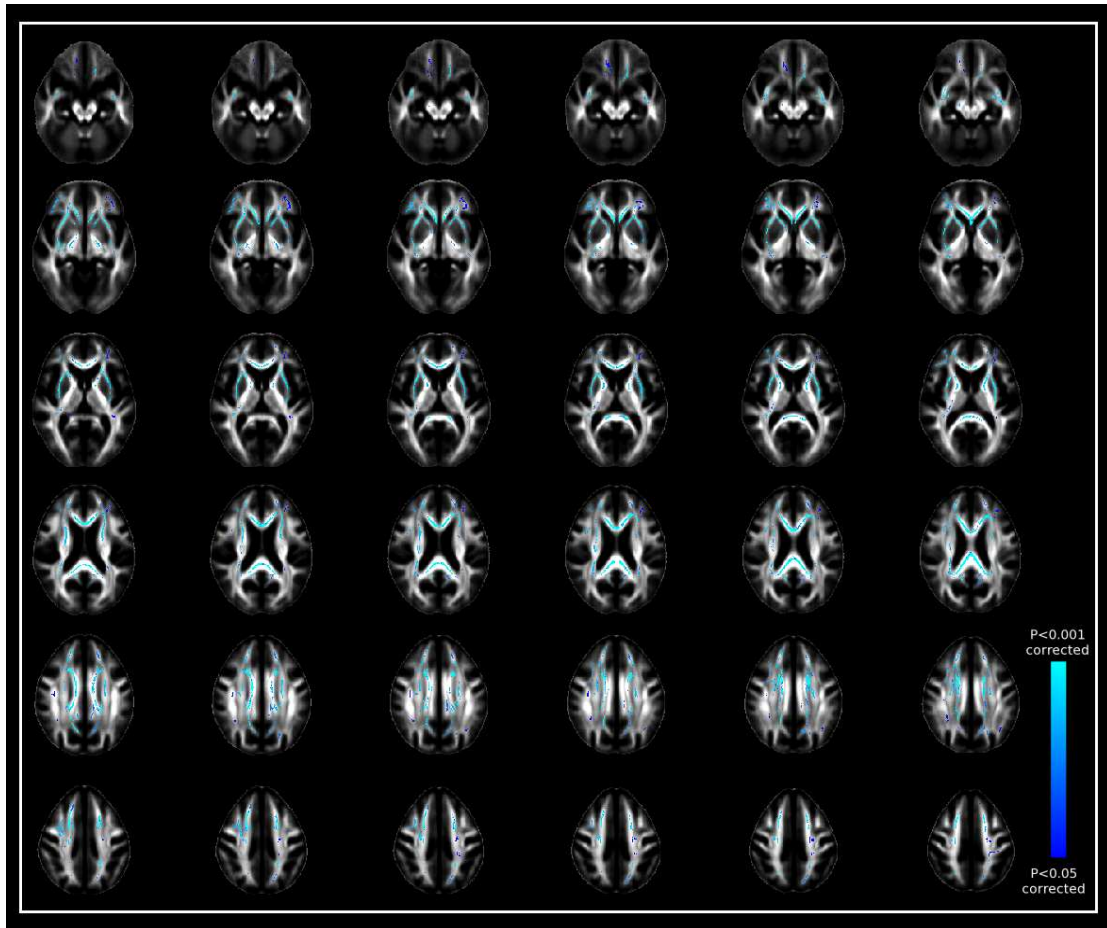

**Figure S2:** Significant MD differences across the three groups ( $F$ -test)

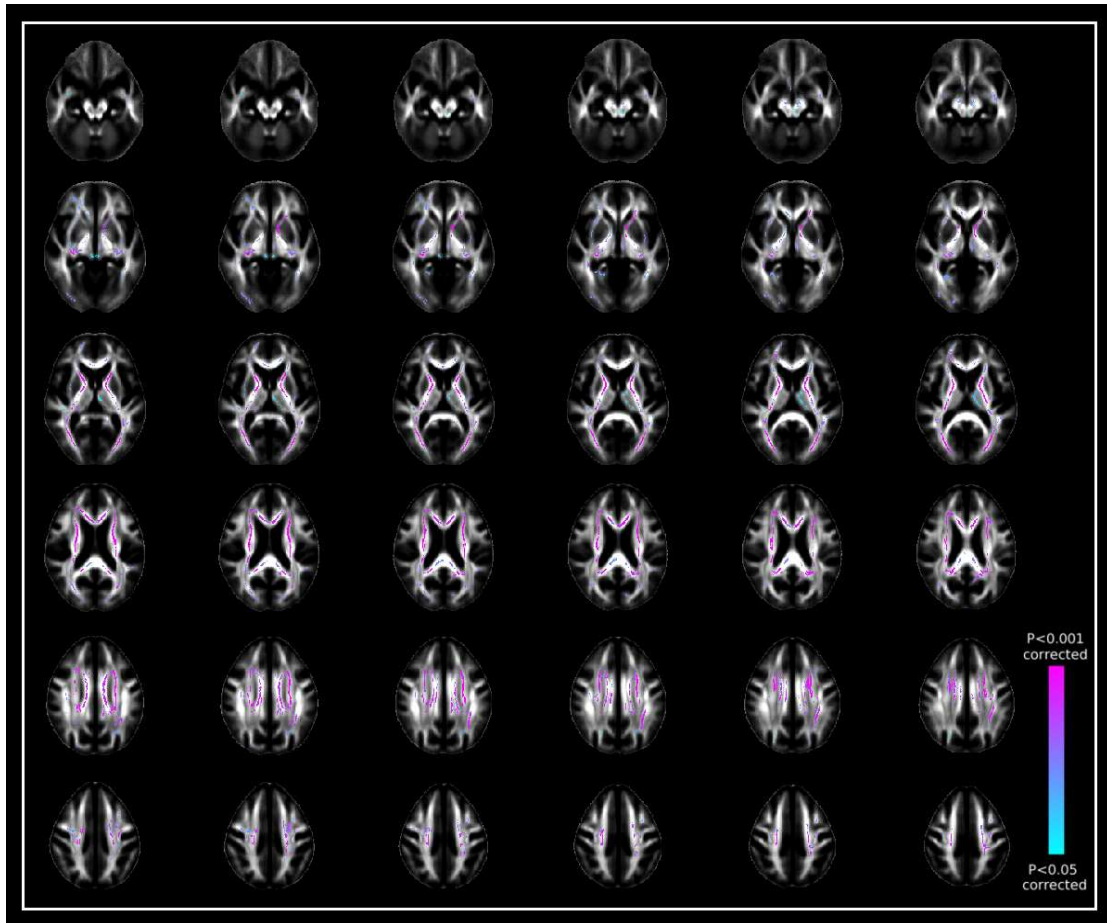

**Figure S3:** Significant MO differences across the three groups ( $F$ -test)

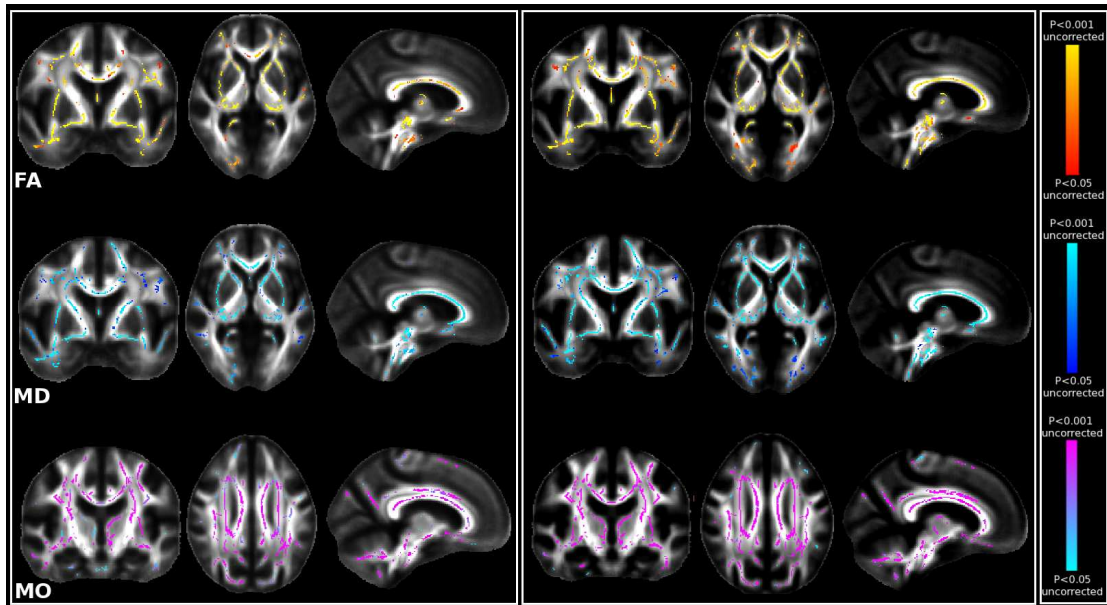

**Figure S4:** Results of the  $F$ -tests carried out across the three groups (CON, MCI, AD) on FA (first row), MD (second row) and MO (third row). *Left*  $F$ -tests performed with the age added as a nuisance covariate. *Right*  $F$ -tests performed without the age as a covariate. Despite a slight loss of statistical power due to the added covariate in the statistical model, the spatial pattern of the results is very similar between the two analyses.

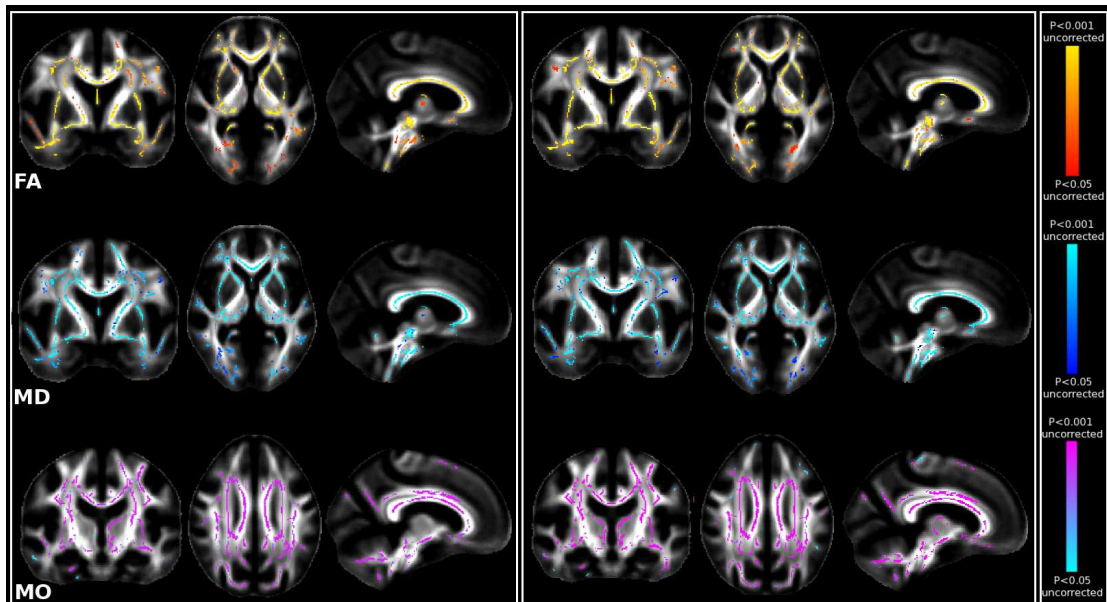

**Figure S5:** Results of the  $F$ -tests carried out across the three groups (CON, MCI, AD) on FA (first row), MD (second row) and MO (third row). *Left*  $F$ -tests performed excluding the 8 MCI patients who later converted to AD and dementia with Lewy bodies. *Right*  $F$ -tests performed on the entire cohort. Despite a slight loss of statistical power due to the loss of 8 subjects, the spatial pattern of the results is very similar between the two analyses.

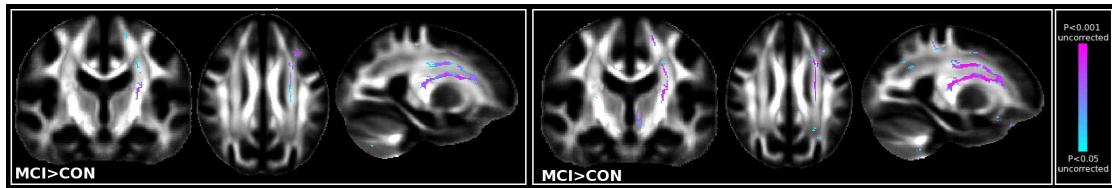

**Figure S6:** Results of the contrast showing an increase of MO in the MCI patients compared with healthy elderly. *Left* Results obtained excluding the 8 MCI patients who later converted to AD and dementia with Lewy bodies. *Right* Results obtained on the entire cohort. Again, the spatial pattern of the results is very similar between the two analyses.

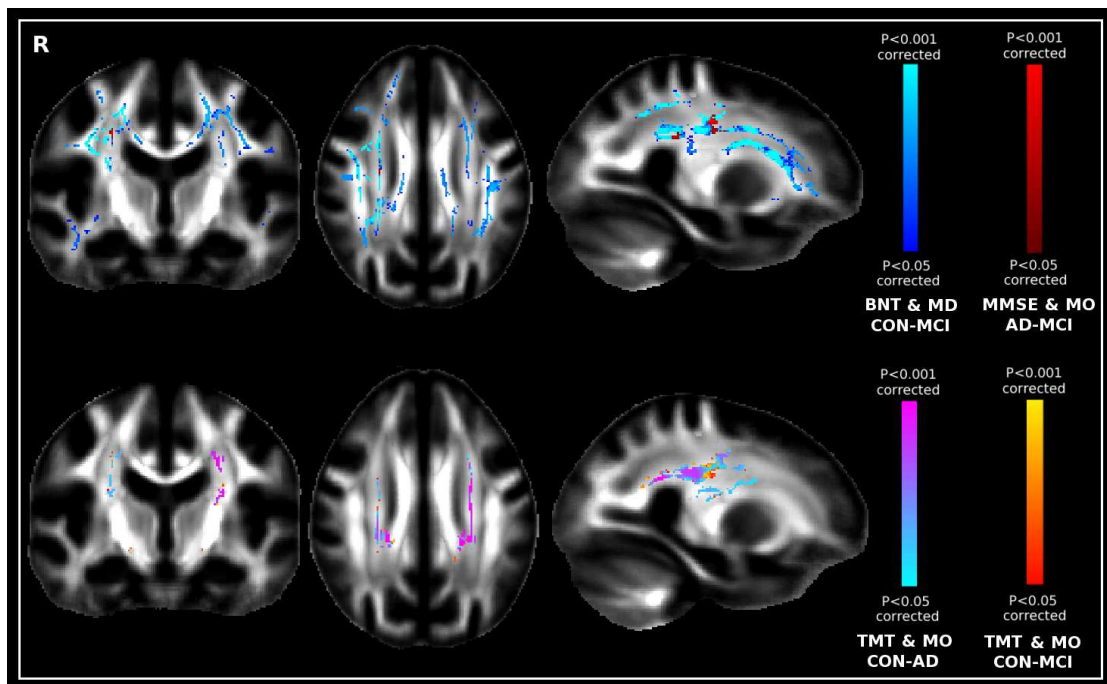

**Figure S7:** TBSS results showing significant differences across groups in correlations between neuropsychological scores and diffusion indices in the centrum semiovale (*Top*: Boston naming test and mean diffusivity, MMSE and mode of anisotropy; *Bottom*: Trail making test part A and mode of anisotropy, note that there is an almost perfect overlap between the contrast CON-AD and CON-MCI). More specifically, we found a significant negative correlation between MMSE and mode of anisotropy in MCI patients but not AD patients, a significant negative correlation between Boston naming test and mean diffusivity in MCI but not in control subjects, a significant positive correlation between Trail making test part A and mode of anisotropy in healthy controls but not in MCI or AD patients. BNT=Boston naming test; MD=Mean diffusivity; MO=Mode of anisotropy; TMT=Trail making test.

## **Criteria for Mild Cognitive Impairment (MCI)**

According to the consensus conference in Stockholm in 2003 (Winblad et al., 2004), the following general criteria will apply for MCI:

1. Not normal, not demented (i.e., DSM-IV, ICD 10 criteria not met)
2. Cognitive decline
  - Self and/or informant report and impairment on objective cognitive tasks and/or
  - Evidence of decline over time on objective cognitive tasks
3. Preserved basic activities of daily living / minimal impairment in complex instrumental functions

In our study, these criteria were implemented as follows:

1. MMSE  $\geq$  24/30.
2. Basic activities of daily living and complex instrumental functions are judged clinically and based on data from the NOSGER (no dimension  $>$  10), IQCODE ( $<$  4.0), and global CDR score ( $\leq$  0.5).
3. Difference in z-scores of  $\geq$  1 on two consecutive assessments separated by at least six months.
4. At least mild impairment in one or more of the following cognitive domains:
  - a. Attention (divided, sustained, etc.)
  - b. Memory (episodic, semantic, verbal, nonverbal, etc.)
  - c. Language (naming, comprehension, repetition, etc.)
  - d. Praxis (ideomotor, ideatoric, etc.)
  - e. Gnosis (faces, objects, etc.)
  - f. Executive functions (verbal + nonverbal fluency, set-shifting, errors, etc.)

## **Criteria for neuropsychologically-relevant cerebrovascular component of a neurodegenerative disease (modified from Erkinjuntti et al., 2000):**

Part of the neuropsychological impairment probably due to a vascular cause judged by cognitive deficits suggestive for cerebrovascular disease

&

Presence or a history of neurologic signs as evidence for cerebrovascular disease such as hemiparesis, lower facial weakness, Babinski sign, sensory deficit, dysarthria, gait disorder, extrapyramidal signs consistent with brain lesion(s)

&

By brain imaging consistent with relevant cerebrovascular disease, but without signs of normal pressure hydrocephalus and specific causes of white matter lesions (e.g. multiple sclerosis, sarcoidosis, brain irradiation).
